# Supplementary material for: Integrating phenotypic and expression profiles to map arsenic-response networks
Source: Springer Nature journal article supplement (doi:10.1186/gb-2004-5-12-r95), 2004-11-29
Supplement: Additional file 2 [file gb-2004-5-12-r95-s2.pdf]

**A**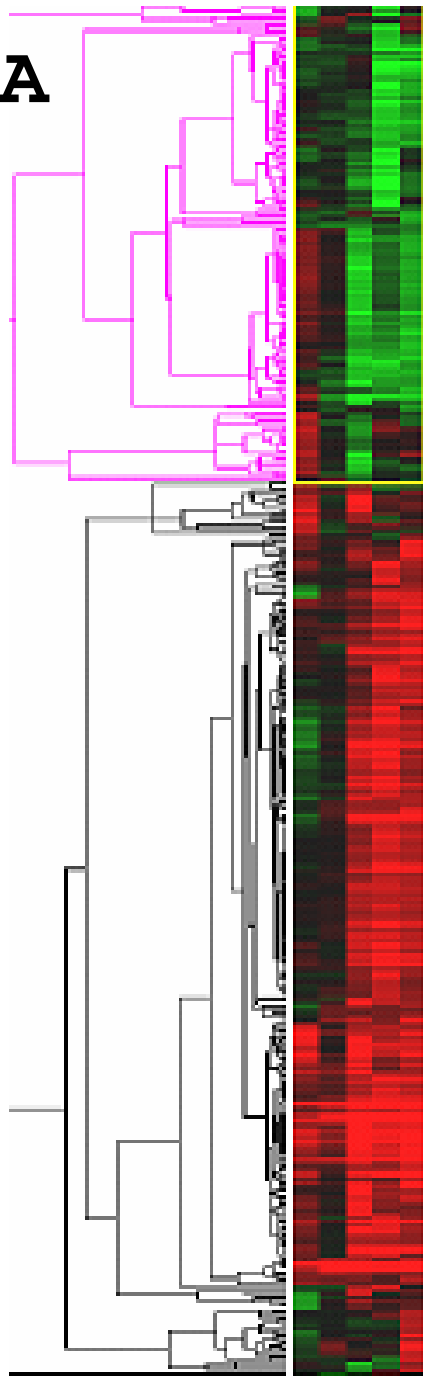

Additional data file 2. Self-organized tree of arsenite treated yeast experiments and table depicting the numbers of significant genes.

4h 100uM AsIII  
 30min 100uM As  
 2h 100uM AsIII  
 30min 1mM AsIII  
 30min 1mM AsIII

**B**

### Differentially Expressed Genes: 3 out of 4 hybridizations

| Experiments                   | 95% Confidence Interval |      |             | 99% Confidence Interval |      |            |
|-------------------------------|-------------------------|------|-------------|-------------------------|------|------------|
|                               | UP                      | DOWN | Total       | UP                      | DOWN | Total      |
| 30 min. 1mM AsIII replicate A | 289                     | 209  | 498 (8.3%)  | 150                     | 58   | 208(3.3%)  |
| 30 min. 1mM AsIII replicate B | 386                     | 232  | 618 (10.3%) | 211                     | 66   | 277 (4.5%) |
| 30 min. 100uM AsIII           | 68                      | 44   | 112 (1.9%)  | 48                      | 17   | 65 (1.04%) |
| 2 hours 100uM AsIII           | 262                     | 170  | 432 (7.2%)  | 84                      | 33   | 117 (1.9%) |
| 4 hours 100uM AsIII           | 190                     | 75   | 265 (4.4%)  | 81                      | 13   | 94 (1.5%)  |
