# Supplementary figures and images for: Integrating phenotypic and expression profiles to map arsenic-response networks
Source: Springer Nature journal article supplement (doi:10.1186/gb-2004-5-12-r95), 2004-11-29

A.

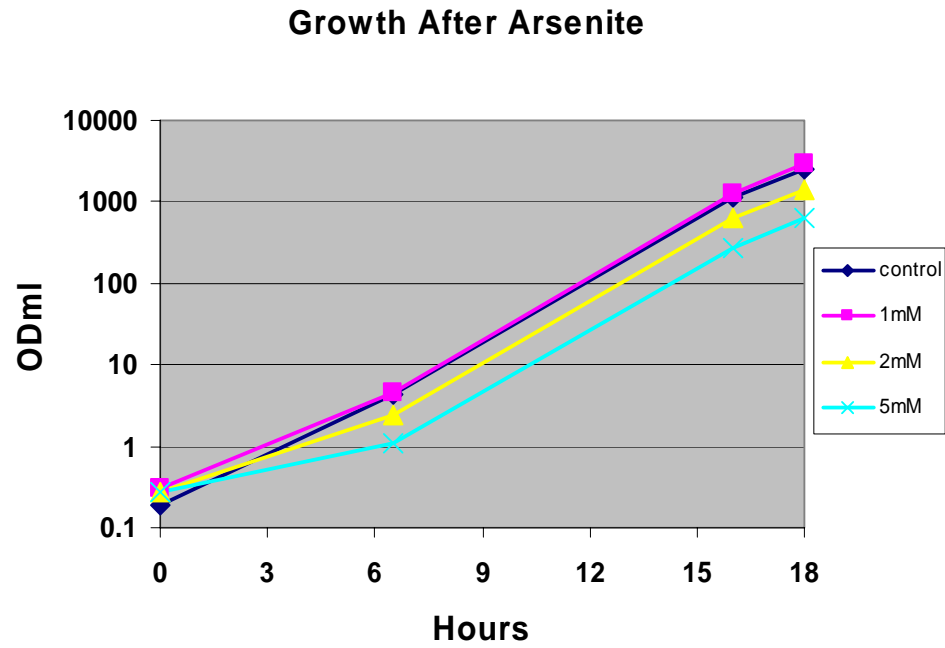

B.

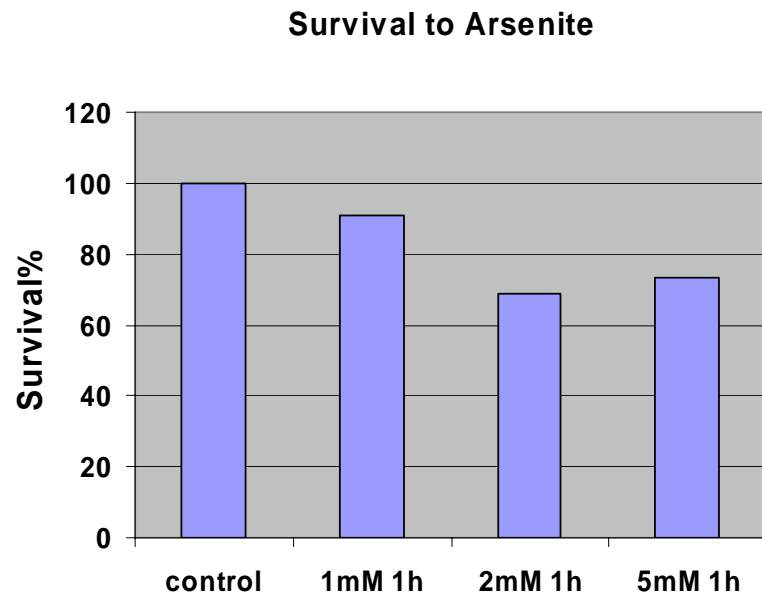

Additional data file 1. The dose response curve of *S. cerevisiae* strain, BY4741.

Supplement: Additional file 1 [file gb-2004-5-12-r95-s1.pdf]
